# Supplementary material for: Nodulation competitiveness and diversification of symbiosis genes in common beans from the American centers of domestication
Source: PubMed Central journal article supplement (PMC8931114; doi:10.1038/s41598-022-08720-0), 2022-03-17
Supplement: 41598_2022_8720_MOESM1_ESM.pdf [file 41598_2022_8720_MOESM1_ESM.pdf]

# NODULATION COMPETITIVENESS AND DIVERSIFICATION OF SYMBIOSIS GENES IN COMMON BEANS FROM THE AMERICAN CENTERS OF DOMESTICATION

O. Mario Aguilar, Mónica M. Collavino and Ulises Mancini

## Supplementary Material

**SI. Fig. 1:** Protein alignment of *P. vulgaris* gene products Nfr1 (A), Nfr5 (B), Astray (C), RabA2 (D) and NIN (E), by using the Clustal-X v2.1 software [30]. Red color represents highly conserved residues; blue color represents variants in sequence.

### 1.A Nfr1 protein alignment

|            | 1                     |                                 | 60                    |
|------------|-----------------------|---------------------------------|-----------------------|
| Nfr1_Lotja | MKLTGILLF             | FILLGHVCF HVESNLRGC             | DLALASYIIL FGVFILGNIT |
| Nfr1_Medtr | MKLRGILLF             | F-MFLKCVF VVESKVRGC             | DVALASYVIM LP-FTYGNIT |
| Nfr1_Glyma | MELKGLLVF             | F-LLEVCVY NVESKVRGC             | DVAFASYVS PDL-LENIA   |
| Nfr1_G1983 | MELKGLLLF             | F-LLEVCVY NVEAKLRGC             | GAALASYVS FGISTLDDIT  |
| Nfr1_BAT93 | MELKGLLLF             | F-LLEVCVY NVEAKLRGC             | GAALASYVS FGISTLDDIT  |
| Nfr1_G2358 | MELKGLLLF             | F-LLEVCVY NVEAKLRGC             | GAALASYVS FGISTLDDIT  |
| Nfr1_G2372 | MELKGLLLF             | F-LLEVCVY NVEAKLRGC             | GAALASYVS FGISTLDDIT  |
| Nfr1_G2124 | MELKGLLLF             | F-LLEVCVY NVEAKLRGC             | GAALASYVS FGISTLDDIT  |
| Nfr1_G2124 | MELKGLLLF             | F-LLEVCVY NVEAKLRGC             | GAALASYVS FGISTLDDIT  |
| Nfr1_Lotja | 61                    | N--DAITSV NKDKLINDIN IQSFQRLNIP | FPDCDIGGEF LGHVFEYSAS |
| Nfr1_Medtr | SSLSVIVISY NKGKVSNGN  | LFAPSRVNI                       | FPCECIGGDF LGHVFEYSAS |
| Nfr1_Glyma | ---EVIISV NEDNINSNG-Y | PLSFYRLNIP                      | FPDCDIGGEF LGHVFEYSAS |
| Nfr1_G1983 | S---DDIVSY NKDRIFNK-N | VLFFYRINIP                      | FPCECIRDEF LGHVFEYSAA |
| Nfr1_BAT93 | S---DDIVSY NKDRIFNK-N | VLFFYRINIP                      | FPCECIRDEF LGHVFEYSAA |
| Nfr1_G2358 | S---DDIVSY NKDRIFNK-N | VLFFYRINIP                      | FPCECIRDEF LGHVFEYSAA |
| Nfr1_G2372 | S---DDIVSY NKDRIFNK-N | VLFFYRINIP                      | FPCECIRDEF LGHVFEYSAA |
| Nfr1_G2124 | S---DDIVSY NKDRIFNK-N | VLFFYRINIP                      | FPCECIRDEF LGHVFEYSAA |
| Nfr1_G2124 | S---DDIVSY NKDRIFNK-N | VLFFYRINIP                      | FPCECIRDEF LGHVFEYSAA |
| Nfr1_Lotja | 121                   | LYANLTTVD LKRFNSYDP             | KNIPNAKVN VTVNCSGNS   |
| Nfr1_Medtr | SYASLTTVE LKRFNSYDQ   | DHIPAKAKVN                      | VTVNCSGNS             |
| Nfr1_Glyma | VYANLTTVE LKRFNSYDQ   | NGIPNAKVN                       | VTVNCSGNS             |
| Nfr1_G1983 | VYANLTTVE LKRFNSYDQ   | NDIPTNAKVN                      | VTVNCSGNS             |
| Nfr1_BAT93 | VYANLTTVE LKRFNSYDQ   | NDIPTNAKVN                      | VTVNCSGNS             |
| Nfr1_G2358 | VYANLTTVE LKRFNSYDQ   | NDIPTNAKVN                      | VTVNCSGNS             |
| Nfr1_G2372 | VYANLTTVE LKRFNSYDQ   | NDIPTNAKVN                      | VTVNCSGNS             |
| Nfr1_G2124 | VYANLTTVE LKRFNSYDQ   | NDIPTNAKVN                      | VTVNCSGNS             |
| Nfr1_G2124 | VYANLTTVE LKRFNSYDQ   | NDIPTNAKVN                      | VTVNCSGNS             |
| Nfr1_Lotja | 181                   | QDIANQSSLD AGLIQSFNPS           | VNFSKDSGIA FIPGRYKNGV |
| Nfr1_Medtr | QKIANQSNID EGLIQSYNSG | VNFSKDSGIV                      | FIPGRDQNGD            |
| Nfr1_Glyma | HDIANETQLD AQLLNYNPG  | VNFSQESGIV                      | FIPGR----             |
| Nfr1_G1983 | HDIANETQLD AQLLNYNPG  | VNFSQESGIV                      | FIPGR-----            |
| Nfr1_BAT93 | HDIANETQLD AQLLNYNPG  | VNFSQESGIV                      | FIPGR-----            |
| Nfr1_G2358 | HDIANETQLD AQLLNYNPG  | VNFSQESGIV                      | FIPGR-----            |
| Nfr1_G2372 | HDIANETQLD AQLLNYNPG  | VNFSQESGIV                      | FIPGR-----            |
| Nfr1_G2124 | HDIANETQLD AQLLNYNPG  | VNFSQESGIV                      | FIPGR-----            |
| Nfr1_G2124 | HDIANETQLD AQLLNYNPG  | VNFSQESGIV                      | FIPGR-----            |
| Nfr1_Lotja | 241                   | IAGTFVLLL AFCMVRYQK             | KEE-EKAKLP TDISMALSTQ |
| Nfr1_Medtr | IAGIFGLLLL VVIYVRYFK  | KKE-EK-EE-                      | TKLAEALSTQ            |
| Nfr1_Glyma | IAGICGLLLL VICIYAKFFQ | KKEGKSKLP                       | T---MVFSSTQ           |
| Nfr1_G1983 | IAGICGLLLL VICIYAKFFQ | KKEGKSKLP                       | T---MVFSSTQ           |
| Nfr1_BAT93 | IAGICGLLLL VICIYAKFFQ | KKEGKSKLP                       | T---MVFSSTQ           |
| Nfr1_G2358 | IAGICGLLLL VICIYAKFFQ | KKEGKSKLP                       | T---MVFSSTQ           |
| Nfr1_G2372 | IAGICGLLLL VICIYAKFFQ | KKEGKSKLP                       | T---MVFSSTQ           |
| Nfr1_G2124 | IAGICGLLLL VICIYAKFFQ | KKEGKSKLP                       | T---MVFSSTQ           |
| Nfr1_G2124 | IAGICGLLLL VICIYAKFFQ | KKEGKSKLP                       | T---MVFSSTQ           |
| Nfr1_Lotja | 301                   | ATGLTSIMVA KMEFTYQEL            | AKATNNSLD NKIQGGGFGA  |
| Nfr1_Medtr | ATVFTGIMVA KMEFTYQEL  | AKATNNSLD                       | NKIQGGGFGA            |
| Nfr1_Glyma | ATGLGIMVA KMEFTYQEL   | AKATNNSLE                       | NKIQGGGFGA            |
| Nfr1_G1983 | ATGLGIMVA KMEFTYQEL   | AKATNNSLE                       | NKIQGGGFGA            |
| Nfr1_BAT93 | ATGLGIMVA KMEFTYQEL   | AKATNNSLE                       | NKIQGGGFGA            |
| Nfr1_G2358 | ATGLGIMVA KMEFTYQEL   | AKATNNSLE                       | NKIQGGGFGA            |
| Nfr1_G2372 | ATGLGIMVA KMEFTYQEL   | AKATNNSLE                       | NKIQGGGFGA            |
| Nfr1_G2124 | ATGLGIMVA KMEFTYQEL   | AKATNNSLE                       | NKIQGGGFGA            |
| Nfr1_G2124 | ATGLGIMVA KMEFTYQEL   | AKATNNSLE                       | NKIQGGGFGA            |
| Nfr1_Lotja | 361                   | STEFCELVK LTHVHNLNV             | RLIGYCVESG LFLVYEIDN  |
| Nfr1_Medtr | SSEFCELVK LTHVHNLNV   | RLIGYCVESG                      | LFLVYEIDN             |
| Nfr1_Glyma | STEFCELVK LTHVHNLNV   | RLIGYCVESG                      | LFLVYEIDN             |
| Nfr1_G1983 | STEFCELVK LTHVHNLNV   | RLIGYCVESG                      | LFLVYEIDN             |
| Nfr1_BAT93 | STEFCELVK LTHVHNLNV   | RLIGYCVESG                      | LFLVYEIDN             |
| Nfr1_G2358 | STEFCELVK LTHVHNLNV   | RLIGYCVESG                      | LFLVYEIDN             |
| Nfr1_G2372 | STEFCELVK LTHVHNLNV   | RLIGYCVESG                      | LFLVYEIDN             |
| Nfr1_G2124 | STEFCELVK LTHVHNLNV   | RLIGYCVESG                      | LFLVYEIDN             |
| Nfr1_G2124 | STEFCELVK LTHVHNLNV   | RLIGYCVESG                      | LFLVYEIDN             |
| Nfr1_Lotja | 421                   | VQIALDSARG LEYIHEHTVP           | VYIHRDKSA NILIDNFRG   |
| Nfr1_Medtr | VEIALDSARG LEYIHEHTVP | VYIHRDKSA                       | NILIDNFRG             |
| Nfr1_Glyma | VQIALDSARG LEYIHEHTVP | VYIHRDKSA                       | NILIDNFRG             |
| Nfr1_G1983 | VQIALDSARG LEYIHEHTVP | VYIHRDKSA                       | NILIDNFRG             |
| Nfr1_BAT93 | VQIALDSARG LEYIHEHTVP | VYIHRDKSA                       | NILIDNFRG             |
| Nfr1_G2358 | VQIALDSARG LEYIHEHTVP | VYIHRDKSA                       | NILIDNFRG             |
| Nfr1_G2372 | VQIALDSARG LEYIHEHTVP | VYIHRDKSA                       | NILIDNFRG             |
| Nfr1_G2124 | VQIALDSARG LEYIHEHTVP | VYIHRDKSA                       | NILIDNFRG             |
| Nfr1_G2124 | VQIALDSARG LEYIHEHTVP | VYIHRDKSA                       | NILIDNFRG             |
| Nfr1_Lotja | 481                   | RLVGTFCYMP PEYAQGDVS            | PKVDVYAFV VLYELISAKN  |
| Nfr1_Medtr | RLVGTFCYMP PEYAQGDVS  | PKVDVYAFV                       | VLYELISAKN            |
| Nfr1_Glyma | RLVGTFCYMP PEYAQGDVS  | PKVDVYAFV                       | VLYELISAKN            |
| Nfr1_G1983 | RLVGTFCYMP PEYAQGDVS  | PKVDVYAFV                       | VLYELISAKN            |
| Nfr1_BAT93 | RLVGTFCYMP PEYAQGDVS  | PKVDVYAFV                       | VLYELISAKN            |
| Nfr1_G2358 | RLVGTFCYMP PEYAQGDVS  | PKVDVYAFV                       | VLYELISAKN            |
| Nfr1_G2372 | RLVGTFCYMP PEYAQGDVS  | PKVDVYAFV                       | VLYELISAKN            |
| Nfr1_G2124 | RLVGTFCYMP PEYAQGDVS  | PKVDVYAFV                       | VLYELISAKN            |
| Nfr1_G2124 | RLVGTFCYMP PEYAQGDVS  | PKVDVYAFV                       | VLYELISAKN            |
| Nfr1_Lotja | 541                   | EALNKSDFCD ALRKLVDPRL           | GENYPIDSVL KIAQLGRAC  |
| Nfr1_Medtr | EALNQTDL SIKRLVDPRL   | REDFYIDSVL                      | KIAQLGRAC             |
| Nfr1_Glyma | EALNQNPFSE VIRKLVDPRL | GENYPIDSVL                      | KIAQLGRAC             |
| Nfr1_G1983 | EALNQNPFSE VIRKLVDPRL | GENYPIDSVL                      | KIAQLGRAC             |
| Nfr1_BAT93 | EALNQNPFSE VIRKLVDPRL | GENYPIDSVL                      | KIAQLGRAC             |
| Nfr1_G2358 | ETLQNPFSE VIRKLVDPRL  | GENYPIDSVL                      | KIAQLGRAC             |
| Nfr1_G2372 | ETLQNPFSE VIRKLVDPRL  | GENYPIDSVL                      | KIAQLGRAC             |
| Nfr1_G2124 | ETLQNPFSE VIRKLVDPRL  | GENYPIDSVL                      | KIAQLGRAC             |
| Nfr1_G2124 | ETLQNPFSE VIRKLVDPRL  | GENYPIDSVL                      | KIAQLGRAC             |
| Nfr1_Lotja | 601                   | SSPTEEDCD                       | SSYESTLIN LLSVR       |
| Nfr1_Medtr | SSPTEEDCD             | TSDENNTLIN                      | LLSVR                 |
| Nfr1_Glyma | SSPTEEDCD             | -SYENNTLIN                      | LLSVR                 |
| Nfr1_G1983 | SSPTEEDLD             | -SYENNTLIN                      | LLSVR                 |
| Nfr1_BAT93 | SSPTEEDLD             | -SYENNTLIN                      | LLSVR                 |
| Nfr1_G2358 | SSPTEEDLD             | -SYENNTLIN                      | LLSVR                 |
| Nfr1_G2372 | SSPTEEDLD             | -SYENNTLIN                      | LLSVR                 |
| Nfr1_G2124 | SSPTEEDLD             | -SYENNTLIN                      | LLSVR                 |
| Nfr1_G2124 | SSPTEEDLD             | -SYENNTLIN                      | LLSVR                 |

## 1.B Nfr5 protein alignment

```

1
Nfr5_Lotja MAVFF--LTS GSLSLFLALT LLF-TNIAAR SEKISGPDFS CPVDSPPSCE YVVTYTAQSP
Nfr5_Glyma MAVFFPFLPL HSQILCLVIM LFS-TNIVAQ SQQDNRTNFS CPSDSPSCE YVVTYTAQSP
Nfr5_G1983 MAVFFVSLTL GAQILYVVLM --FF-TCIEAQ SQQTNGTNFS CPNSPSPSCE YVVTYISQSP
Nfr5_BAT93 MAVFFVSLTL GAQILYVVLM --FF-TCIEAQ SQQTNGTNFS CPNSPSPSCE YVVTYISQSP
Nfr5_G2358 MAVFFVSLTL GAQILYVVLM --FS-TCIEAQ SQQTNGTNFS CPNSPSPSCE YVVTYITQSP
Nfr5_G2372 MAVFFVSLTL GAQILYVVLM --FS-TCIEAQ SQQTNGTNFS CPNSPSPSCE YVVTYITQSP
Nfr5_G2124 MAVFFVSLTL GAQILYVVLM --FS-TCIEAQ SQQTNGTNFS CPNSPSPSCE YVVTYITQSP
Nfr5_G2124 MAVFFVSLTL GAQILYVVLM --FS-TCIEAQ SQQTNGTNFS CPNSPSPSCE YVVTYITQSP
Nfr5_Medtr MSAFF--LPS SSHALFLVLM LFFLTNISAQ PLYISETNFT CPVDSPPSCE YVAVYRAQSP

61
Nfr5_Lotja NLSLSTNISD IFDTSPLSIA RASNIDAGKD KLVPGQVLLV PVTCCGAGNH SSANTSYQIQ
Nfr5_Glyma NLSLSTNISN IFDTSPLSIA RASNLEPMDK KLVKQVLLV PVTCCGCTGNR SFANISYEIN
Nfr5_G1983 NLSLSTSVSN IFDTSPLSIA RASNQHEED KLIPGQVLLI PVTCCGCTGNR SFANISYEIN
Nfr5_BAT93 NLSLSTSVSN IFDTSPLSIA RASNQHEED KLIPGQVLLI PVTCCGCTGNR SFANISYEIN
Nfr5_G2358 NLSLSTSVSN IFDTSPLSIA RASNQHEED KLIPGQVLLI PVTCCGCTGNR SFANISYEIN
Nfr5_G2372 NLSLSTSVSN IFDTSPLSIA RASNQHEED KLIPGQVLLI PVTCCGCTGNR SFANISYEIN
Nfr5_G2124 NLSLSTSVSN IFDTSPLSIA RASNQHEED KLIPGQVLLI PVTCCGCTGNR SFANISYEIN
Nfr5_G2124 NLSLSTSVSN IFDTSPLSIA RASNQHEED KLIPGQVLLI PVTCCGCTGNR SFANISYEIN
Nfr5_Medtr NLSLSTNISD IFNLSPLRIA KASNIEADK KLIPDQLLLV PVTCCGCTGMR SFANITYS1K

121
Nfr5_Lotja LQDSYDFVAT TLYENLTNWH IVQASNPGVN FYLLPERVKV VFPLFCRCPS KNQLNRG1QY
Nfr5_Glyma QGDSFYFVAT TSYENLTNWR AVMDLNPVLS FNKLPIGIQV VFPLFCCKPS KNQLDRG1KY
Nfr5_G1983 QGDSFYFVAT TLYQNLTNWH AVMDLNPGLS PFTLPIGIQV VIPLFCCKPS KNQLDRG1KY
Nfr5_BAT93 QGDSFYFVAT TLYQNLTNWH AVMDLNPGLS OFTLPIGIQV VIPLFCCKPS KNQLDRG1KY
Nfr5_G2358 QGDSFYFVAT TLYQNLTNWH AVMDLNPGLS PFTLPIGIQV VIPLFCCKPS KNQLDRG1KY
Nfr5_G2372 QGDSFYFVAT TLYQNLTNWH AVMDLNPGLS PFTLPIGIQV VIPLFCCKPS KNQLDRG1KY
Nfr5_G2124 QGDSFYFVAT TLYQNLTNWH AVMDLNPGLS PFTLPIGIQV VIPLFCCKPS KNQLDRG1KY
Nfr5_G2124 QGDSFYFVAT TLYQNLTNWH AVMDLNPGLS PFTLPIGIQV VIPLFCCKPS KNQLDRG1KY
Nfr5_Medtr QGNFFILSI TSYQNLTNYL EFKNFNPLS PTLPLDITKV SVPLFCCKPS KNQLNRG1KY

181
Nfr5_Lotja LITYVWKPNL NVSLVSAKFG ASPADILTEN RYQDFTAAT NLPILIPVTO LPBLTQPSND
Nfr5_Glyma LITYVWKPGD NVSLVSDKFG ASPEDIMSEN NYQNFATAAN NLPVLPVTR LPVLARSPPD
Nfr5_G1983 LITHWQPNL NVSFVSNKLG ASPQDILSEN NYQNFATAAS NLPVLPVTL LPDLIQSPSD
Nfr5_BAT93 LITHWQPNL NVSFVSNKLG ASPQDILSEN NYQNFATAAS NLPVLPVTL LPDLIQSPSD
Nfr5_G2358 LITHWQPNL NVSFVSNKLG ASPQDILSEN NYQNFATAAS NLPVLPVTL LPDLIQSPSD
Nfr5_G2372 LITHWQPNL NVSFVSNKLG ASPQDILSEN NYQNFATAAS NLPVLPVTL LPDLIQSPSD
Nfr5_G2124 LITHWQPNL NVSFVSNKLG ASPQDILSEN NYQNFATAAS NLPVLPVTL LPDLIQSPSD
Nfr5_G2124 LITHWQPNL NVSFVSNKLG ASPQDILSEN NYQNFATAAS NLPVLPVTL LPDLIQSPSD
Nfr5_Medtr LITYWQDND NVTLVSSKFG ASQVEMLAEN NH--NFTAAT NRSVLPVTS LPKLDQPSND

241
Nfr5_Lotja GRKSSI-HLL VILGITLQCT LLTAVLTGTL VYVYCRKKA LNRASSAET ADKLLSGVSG
Nfr5_Glyma GRKGI-RLP VIIGISLQCT LLVVLAVLL VYVYCLMKT LNRASSAET ADKLLSGVSG
Nfr5_G1983 GRKHRI-GLP VIIGISLQCT LLVVSAIILL CVVCLMKMS LNRASSAET ADKLLSGVSG
Nfr5_BAT93 GRKHRI-GLP VIIGISLQCT LLVVSAIILL CVVCLMKMS LNRASSAET ADKLLSGVSG
Nfr5_G2358 GRKHRI-GLP VIIGISLQCT LLVVSAIILL CVVCLMKMS LNRASSAET ADKLLSGVSG
Nfr5_G2372 GRKHRI-GLP VIIGISLQCT LLVVSAIILL CVVCLMKMS LNRASSAET ADKLLSGVSG
Nfr5_G2124 GRKHRI-GLP VIIGISLQCT LLVVSAIILL CVVCLMKMS LNRASSAET ADKLLSGVSG
Nfr5_G2124 GRKHRI-GLP VIIGISLQCT LLVVSAIILL CVVCLMKMS LNRASSAET ADKLLSGVSG
Nfr5_Medtr GRKSSQNLA LIIGISLQSA FFLVLTLSL VYVYCLMKR LNRSSSET ADKLLSGVSG

301
Nfr5_Lotja YVSKFNVEI DEIMEATKDF SDECKVGEV YKANIEGRV AVKIKIEGGA NEELKIQKV
Nfr5_Glyma YVSKPTMYET DAIMEATMNL SEQCKIGESV YKANIEGKVL AVKRFKED-V TELKILQKV
Nfr5_G1983 YVSKPTMYET GAILEATMNL SEQCKIGESV YKANIEGKVL AVKRFKED-V TELKILQKV
Nfr5_BAT93 YVSKPTMYET GAILEATMNL SEQCKIGESV YKANIEGKVL AVKRFKED-V TELKILQKV
Nfr5_G2358 YVSKPTMYET GAILEATMNL SEQCKIGESV YKANIEGKVL AVKRFKED-V TELKILQKV
Nfr5_G2372 YVSKPTMYET GAILEATMNL SEQCKIGESV YKANIEGKVL AVKRFKED-V TELKILQKV
Nfr5_G2124 YVSKPTMYET GAILEATMNL SEQCKIGESV YKANIEGKVL AVKRFKED-V TELKILQKV
Nfr5_G2124 YVSKPTMYET GAILEATMNL SEQCKIGESV YKANIEGKVL AVKRFKED-V TELKILQKV
Nfr5_Medtr YVSKPTMYEI DAIMEGTNL SDNCKIGESV YKANIDGRVL AVKIKIKD-A SEELKILQKV

361
Nfr5_Lotja NHGNLVKLMG VSSDNDGNCF LVVEYAENGSLAEWLFSSK- ---SGTFPNSL TWSQRISIAV
Nfr5_Glyma NHGNLVKLMG VSSDNDGNCF VVVEYAENGSLDEWLFSSK SDTSNSRASL TWCQRISIAV
Nfr5_G1983 NHGNLVKLMG VSSDNDGNCF VVVEYAENGSLQEWLFAKSC SETLNSRSTSL TWCQRISIAV
Nfr5_BAT93 NHGNLVKLMG VSSDNDGNCF VVVEYAENGSLQEWLFAKSC SETLNSRSTSL TWCQRISIAV
Nfr5_G2358 NHGNLVKLMG VSSDNDGNCF VVVEYAENGSLQEWLFAKSC SETLNSRSTSL TWCQRISIAV
Nfr5_G2372 NHGNLVKLMG VSSDNDGNCF VVVEYAENGSLQEWLFAKSC SETLNSRSTSL TWCQRISIAV
Nfr5_G2124 NHGNLVKLMG VSSDNDGNCF VVVEYAENGSLQEWLFAKSC SETLNSRSTSL TWCQRISIAV
Nfr5_G2124 NHGNLVKLMG VSSDNDGNCF VVVEYAENGSLQEWLFAKSC SETLNSRSTSL TWCQRISIAV
Nfr5_Medtr NHGNLVKLMG VSSDNDGNCF LVVEYAENGSLAEWLFSES- SKTSNSVSVL TWSQRITIAM

421
Nfr5_Lotja DVAVGLQYMH ERTYPRIIHR DITTSNILLD SNFKAKIANF AMARTSTNPM MPKIDVFAFG
Nfr5_Glyma DVAMGLQYMH EHAYPRIVHR DITTSNILLD SNFKAKIANF SMARTFTNPM MPKIDVFAFG
Nfr5_G1983 DVSMGLQYMH EHAYPRIVHR DITTSNILLD SNFKAKIANF SMARTFTNPM MSKIDVFAFG
Nfr5_BAT93 DVSMGLQYMH EHAYPRIVHR DITTSNILLD SNFKAKIANF SMARTFTNPM MSKIDVFAFG
Nfr5_G2358 DVSMGLQYMH EHAYPRIVHR DITTSNILLD SNFKAKIANF SMARTFTNPM MSKIDVFAFG
Nfr5_G2372 DVSMGLQYMH EHAYPRIVHR DITTSNILLD SNFKAKIANF SMARTFTNPM MSKIDVFAFG
Nfr5_G2124 DVSMGLQYMH EHAYPRIVHR DITTSNILLD SNFKAKIANF SMARTFTNPM MSKIDVFAFG
Nfr5_G2124 DVSMGLQYMH EHAYPRIVHR DITTSNILLD SNFKAKIANF SMARTFTNPM MSKIDVFAFG
Nfr5_Medtr DVAVGLQYMH ERTYPRIIHR DITTSNILLG SNFKAKIANF GMARTSTNSM MPKIDVFAFG

481
Nfr5_Lotja VVLIELLTGR KAMTTRENKE VVMLNKDIME IFDIEENREE RLRKWMDFNL ESFYHIDNAL
Nfr5_Glyma VVLIELLTGR KAMTTRENKE VVMLNKDIWK IFDQENREE RLRKWMDFKL ESYPIDYAL
Nfr5_G1983 VVLIELLTGR KAMTTRENKE VVMLATDIWK IFDQENREE RLRKWMDFKL DNYYPIDYAL
Nfr5_BAT93 VVLIELLTGR KAMTTRENKE VVMLNKDIWK IFDQENREE RLRKWMDFKL DNYYPIDYAL
Nfr5_G2358 VVLIELLTGR KAMTTRENKE VVMLNKDIWK IFDQENREE RLRKWMDFKL DNYYPIDYAL
Nfr5_G2372 VVLIELLTGR KAMTTRENKE VVMLNKDIWK IFDQENREE RLRKWMDFKL DNYYPIDYAL
Nfr5_G2124 VVLIELLTGR KAMTTRENKE VVMLATDIWK IFDQENREE RLRKWMDFKL DNYYPIDYAL
Nfr5_G2124 VVLIELLTGR KAMTTRENKE VVMLATDIWK IFDQENREE RLRKWMDFKL DNYYPIDYAL
Nfr5_Medtr VVLIELLTGR KAMTTRENKE VVILNKDFWK IFDLEGNREE RLRKWMDFKL ESFYHIDNAL

541
Nfr5_Lotja SLASLAVNCT ADKLSRPSM AEIVLSLSFL TQSSNPTLE RSLTSSGLDV EDDAHIVTSI
Nfr5_Glyma SLASLAVNCT ADKLSRPTI AEIVLSLSLL TQSP-ATLE RSLTSSGLDV EA-TQIVTSI
Nfr5_G1983 SLASLAVNCT ADKLSRPTI AEIVLSLSLL TQSP-ATLE RSLTSSGLDV EA-TQIVTSI
Nfr5_BAT93 SLASLAVNCT ADKLSRPTI AEIVLSLSLL TQSP-ATLE RSLTSSGLDV EA-TQIVTSI
Nfr5_G2358 SLASLAVNCT ADKLSRPTI AEIVLSLSLL TQSP-GTLE RSLTSSGLDV EA-TQIVTSI
Nfr5_G2372 SLASLAVNCT ADKLSRPTI AEIVLSLSLL TQSP-GTLE RSLTSSGLDV EA-TQIVTSI
Nfr5_G2124 SLASLAVNCT ADKLSRPTI AEIVLSLSLL TQSP-GTLE RSLTSSGLDV EA-TQIVTSI
Nfr5_G2124 SLASLAVNCT ADKLSRPTI AEIVLSLSLL TQSP-GTLE RSLTSSGLDV EA-TQIVTSI
Nfr5_Medtr SLASLAVNCT ADKLSRPTI AEIVLSLSLL TQSP-ATLE RSLTSSGLDV EA-TQIVTSI

601
Nfr5_Lotja TAR
Nfr5_Glyma AAR
Nfr5_G1983 SAR
Nfr5_BAT93 SAR
Nfr5_G2358 SAR
Nfr5_G2372 SAR
Nfr5_G2124 SAR
Nfr5_G2124 SAR
Nfr5_Medtr IAR

```

## 1.C Astry protein alignment

```

1
ASTR_Lotja MDQHGGVATG SHERNELVRV RHG-SDHGSK PVKNLNGQIC QICGETVGLT ANGDIFVACH 60
ASTR_Medtru ME---GVETG SHERNELVRA RHDVSETGSK PLKNLNGQIC QICGDTVGLT ATGEVFFVACH
ASTR_Glymax MERSGGMVTG SHERNELVRV RHG-SDSGSK PLKNLNGQIC QICGDTIGLT ATGDLFVACH
ASTR_G19833 MERSGGMVTG SHERNELVTV RHG-SDSGSK PVKNLNGQIC QICGDTIGLT ATGDVFFVACH
ASTR_BAT93 MERSGGMVTG SHERNELVTV RHG-SDSGSK PVKNLNGQIC QICGDTIGLT ATGDVFFVACH
ASTR_G23587 MERSGGMVTG SHERNELVTV RHG-SDSGSK PVKNLNGQIC QICGDTIGLT ATGDVFFVACH
ASTR_G23724 MERSGGMVTG SHERNELVTV RHG-SDSGSK PVKNLNGQIC QICGDTIGLT ATGDVFFVACH
ASTR_G21244 MERSGGMVTG SHERNELVTV RHG-SDSGSK PVKNLNGQIC QICGDTIGLT ATGDVFFVACH
ASTR_G21245 MERSGGMVTG SHERNELVTV RHG-SDSGSK PVKNLNGQIC QICGDTIGLT ATGDVFFVACH

61
ASTR_Lotja ECAFQLCHPC YEYERNVSP YCPQCKTRYE SHKSSQMEG DDDDDDDDED VDDLENEVKY 120
ASTR_Medtru ECSFPLCYPC YEYEWKNVIQ SCPQCKTRFK SHKDDPRVKG GDD----EDD VDDLRLNEVKY
ASTR_Glymax ECGFPLCHSC YEYELKNVSQ SCPQCKTFT SRQEGAEVEG DDDD---EDD ADDLDNGINY
ASTR_G19833 ECGLPLCHSC YEYELKNVSQ SCPQCKTRFT SHQEGAGVEG DDDD---DED ADDLDNEINY
ASTR_BAT93 ECGFPLCHSC YEYELKNVSQ SCPQCKTRFT SHQEGAGVEG DDDD---DED ADDLDNEINY
ASTR_G23587 ECGFPLCHSC YEYELKNVSQ SCPQCKTRFT SHQEGAGVEG DDDD---DED ADDLDNEINY
ASTR_G23724 ECGFPLCHSC YEYELKNVSQ SCPQCKTRFT SHQEGAGVEG DDDD---DED ADDLDNEINY
ASTR_G21244 ECGFPLCHSC YEYELKNVSQ SCPQCKTRFT SHQEGAGVEG DDDD---DED ADDLDNEINY
ASTR_G21245 ECGFPLCHSC YEYELKNVSQ SCPQCKTRFT SHQEGAGVEG DDDD---DED ADDLDNEINY

121
ASTR_Lotja GQGNRMKARL QWEEDADLSS SSGHDSQMQN PHLTNGQLMS GENLCAT--- -----TSGPM 180
ASTR_Medtru GQGNNAKAGW QWDEDADLSS SSGHDSQLQN PHLTNGQLMS GDIPCATSDT QSVQTTSGPL
ASTR_Glymax GQGNNSKSGM LWEEADLSS SSGHDSHIPN PHLVNGQPMS GEFPCATSDA QSMQTTSDPM
ASTR_G19833 GQGNNSKAGM QWEEDADFSS SSGHDSQIPN PHLANGQPMS GDIPCATSDA QSMQTTSGLM
ASTR_BAT93 GQGNNSKAGM QWEEDADFSS SSGHDSQIPN PHLANGQPMS GDIPCATSDA QSMQTTSGLM
ASTR_G23587 GQGNNSKAGM QWEEDADFSS SSGHDSQIPN PHLANGQPMS GDIPCATSDA QSMQTTSGLM
ASTR_G23724 GQGNNSKAGM QWEEDADFSS SSGHDSQIPN PHLANGQPMS GDIPCATSDA QSMQTTSGLM
ASTR_G21244 GQGNNSKAGM QWEEDADFSS SSGHDSQIPN PHLANGQPMS GDIPCATSDA QSMQTTSGLM
ASTR_G21245 GQGNNSKAGM QWEEDADFSS SSGHDSQIPN PHLANGQPMS GDIPCATSDA QSMQTTSGLM

181
ASTR_Lotja GQSKKQVSLP YVDPKQPGLE SDEEIRRVEP FGGESAATSA SRPDTGSNPG PERVQGAGEG 240
ASTR_Medtru GQSENVHSRA YVDPKQPGLE SDEEIRRVDP MGGESAGTSA SRKGTGSTAG PERVQGAGEG
ASTR_Glymax GQSEKQVSLP YADPKQPGPE SDEEIRRVEP IGGESAGTSA SRPDAGSNAG TERAQGTGDS
ASTR_G19833 ----- -AAAKQPGPE SDEEIRRVEP IGGESAGTVA SRPDARSNAG AERVQGTGEG
ASTR_BAT93 ----- -AAAKQPGPE SDEEIRRVEP IGGESAGTVA SRPDARSNAG AERVQGTGEG
ASTR_G23587 ----- -AAAKQPGPE SDEEIRRVEP IGGESAGTVA SRPDARSNAG AERVQGTGEG
ASTR_G23724 ----- -AAAKQPGPE SDEEIRRVEP IGGESAGTVA SRPDARSNAG AERVQGTGEG
ASTR_G21244 ----- -AAAKQPGPE SDEEIRRVEP IGGESAGTVA SRPDARSNAG AERVQGTGEG
ASTR_G21245 ----- -AAAKQPGPE SDEEIRRVEP IGGESAGTVA SRPDARSNAG AERVQGTGEG

241
ASTR_Lotja QKKRGRSSAD KESKRLKRLR RNRVSAQQAR ERKKAYLTDL ETKVKDLETN NSELKERLST 300
ASTR_Medtru QKKRGRSPAD KESKRLKRLR RNRVSAQQAR ERKKAYLSDL ETRVNDLEKK NSELKEKLST
ASTR_Glymax QKKRGRSPAD KESKRLKRLR RNRVSAQQAR ERKKAYLIDL ETRVKDLEKK NSELKERLST
ASTR_G19833 QKKRGRSPAD KESKRLKRLR RNRVSAQQAR ERKKAYLIDL ETRVKDLEKK NSELKERLST
ASTR_BAT93 QKKRGRSPAD KESKRLKRLR RNRVSAQQAR ERKKAYLIDL ETRVKDLEKK NSELKERLST
ASTR_G23587 QKKRGRSPAD KESKRLKRLR RNRVSAQQAR ERKKAYLIDL ETRVKDLEKK NSELKERLST
ASTR_G23724 QKKRGRSPAD KESKRLKRLR RNRVSAQQAR ERKKAYLIDL ETRVKDLEKK NSELKERLST
ASTR_G21244 QKKRGRSPAD KESKRLKRLR RNRVSAQQAR ERKKAYLIDL ETRVKDLEKK NSELKERLST
ASTR_G21245 QKKRGRSPAD KESKRLKRLR RNRVSAQQAR ERKKAYLIDL ETRVKDLEKK NSELKERLST

301
ASTR_Lotja LQENQMLRQ ILKNTTASRR GNSGTTNAE 330
ASTR_Medtru LQENQMLRQ ILKNTTASRR GNSGNTAE
ASTR_Glymax LQENQMLRQ ILKNTTASRR GNSGTTNAE
ASTR_G19833 LQENQMLRQ ILKNTTASRR GNSGTTNAE
ASTR_BAT93 LQENQMLRQ ILKNTTASRR GNSGTTNAE
ASTR_G23587 LQENQMLRQ ILKNTTASRR GNSGTTNAE
ASTR_G23724 LQENQMLRQ ILKNTTASRR GNSGTTNAE
ASTR_G21244 LQENQMLRQ ILKNTTASRR GNSGTTNAE
ASTR_G21245 LQENQMLRQ ILKNTTASRR GNSGTTNAE
```

## 1.D Rab protein alignment

```

1                                     60
Rab_Glyma MAHRVDHEYD YLFKIVLIGD SGVGKSNILS RFRNEFCLE SKSTIGVEFA TRTLQVEGKT
Rab_19833 MTHRVDHEYD YLFKIVLIGD SGVGKSNILS RFRNEFCLE SKSTIGVEFA TRTLQVEGKT
Rab_BAT93  MTHRVDHEYD YLFKIVLIGD SGVGKSNILS RFRNEFCLE SKSTIGVEFA TRTLQVEGKT
Rab_21244 MTHRVDHEYD YLFKIVLIGD SGVGKSNILS RFRNEFCLE SKSTIGVEFA TRTLQVEGKT
Rab_23724 MTHRVDHEYD YLFKIVLIGD SGVGKSNILS RFRNEFCLE SKSTIGVEFA TRTLQVEGKT
Rab_23587 MTHRVDHEYD YLFKIVLIGD SGVGKSNILS RFRNEFCLE SKSTIGVEFA TRTLQVEGKT
Rab_21245 MTHRVDHEYD YLFKIVLIGD SGVGKSNILS RFRNEFCLE SKSTIGVEFA TRTLQVEGKT
Rab_Lotja  MAHRVDHEYD YLFKIVLIGD SGVGKSNILS RFRNEFCLE SKSTIGVEFA TRTLQVEGKT
Rab_Medtr MAHRVDHEYD YLFKIVLIGD SGVGKSNILS RFRNEFCLE SKSTIGVEFA TRTLQVEGKT

61                                     120
Rab_Glyma VKAQIWDTAG QERYRAITSA YYRGAVGALL VYDITKRQTF DNVQRWLREL RDHADSNIVI
Rab_19833 VKAQIWDTAG QERYRAITSA YYRGAVGALL VYDITKRQTF DNVQRWLREL RDHADSNIVI
Rab_BAT93  VKAQIWDTAG QERYRAITSA YYRGAVGALL VYDITKRQTF DNVQRWLREL RDHADSNIVI
Rab_21244 VKAQIWDTAG QERYRAITSA YYRGAVGALL VYDITKRQTF DNVQRWLREL RDHADSNIVI
Rab_23724 VKAQIWDTAG QERYRAITSA YYRGAVGALL VYDITKRQTF DNVQRWLREL RDHADSNIVI
Rab_23587 VKAQIWDTAG QERYRAITSA YYRGAVGALL VYDITKRQTF DNVQRWLREL RDHADSNIVI
Rab_21245 VKAQIWDTAG QERYRAITSA YYRGAVGALL VYDITKRQTF DNVQRWLREL RDHADSNIVI
Rab_Lotja  VKAQIWDTAG QERYRAITSA YYRGAVGALL VYDITKRQTF DNVQRWLREL RDHADSNIVI
Rab_Medtr VKAQIWDTAG QERYRAITSA YYRGAVGALL VYDITKRQTF DNVQRWLREL RDHADSNIVI

121                                    180
Rab_Glyma MMAGNKSCLS HLRVSEDDG QALAREGLS FLETSALEAT NIEKAFQITL TEIYHIVSKK
Rab_19833 MMAGNKSCLS HLRVYEDDG QNLAEREGLS FLETSALEAT NIEKAFQITL TEIYHIVSKK
Rab_BAT93  MMAGNKSCLS HLRVYEDDG QNLAEREGLS FLETSALEAT NIEKAFQITL TEIYHIVSKK
Rab_21244 MMAGNKSCLS HLRVYEDDG QNLAEREGLS FLETSALEAT NIEKAFQITL TEIYHIVSKK
Rab_23724 MMAGNKSCLS HLRVYEDDG QNLAEREGLS FLETSALEAT NIEKAFQITL TEIYHIVSKK
Rab_23587 MMAGNKSCLS HLRVYEDDG QNLAEREGLS FLETSALEAT NIEKAFQITL TEIYHIVSKK
Rab_21245 MMAGNKSCLS HLRVYEDDG QNLAEREGLS FLETSALEAT NIEKAFQITL TEIYHIVSKK
Rab_Lotja  MMAGNKSCLN HLRVSEDDG GALSEKEGLS FLETSALEAT NIEKAFQITL TEIYHIVSKK
Rab_Medtr MMAGNKSCLN HLRVSEDDG QALAEKEGLS FLETSALEAT NIEKAFQITL TEIYHIVSKK

181                                    216
Rab_Glyma ALAAQEAVG TTLPGQGTI NVGDASGNTK RGCST
Rab_19833 ALAAQEAVG TTLPGQGTI NVGDASGNTK RGCST
Rab_BAT93  ALAAQEAVG TTLPGQGTI NVGDASGNTK RGCST
Rab_21244 ALAAQEAVG TTLPGQGTI NVGDASGNTK RGCST
Rab_23724 ALAAQEAVG TTLPGQGTI NVGDASGNTK RGCST
Rab_23587 ALAAQEAVG TTLPGQGTI NVGDASGNTK RGCST
Rab_21245 ALAAQEAVG TTLPGQGTI NVGDASGNTK RGCST
Rab_Lotja  ALAAQEATAG ASVPGQGTI NVADTSNTK KGCST
Rab_Medtr ALAAQEAG TSLPGQGTI NVADSSANTK RGCST
```



**SI. Table 1:** Accession number of sequences retrieved from data bases described in Methods that were used for the protein alignment and phylogenetic analysis

|                                | <b>NFR1</b>   | <b>NFR5</b>   | <b>ASTRAY</b> | <b>NIN</b>    | <b>RAB</b>    |
|--------------------------------|---------------|---------------|---------------|---------------|---------------|
| <b><i>P. vul. G19833</i></b>   | XP_007141617  | XP_007156886  | XP_007146305  | XP_007137300  | ACV82919      |
| <b><i>P. vul. BAT93*</i></b>   | GCA_001517995 | GCA_001517995 | GCA_001517995 | GCA_001517995 | GCA_001517995 |
| <b><i>P. vul. G23587**</i></b> | SRX2537723    | SRX2537723    | SRX2537723    | SRX2537723    | SRX2537723    |
| <b><i>P. vul. G23724**</i></b> | SRX2537724    | SRX2537724    | SRX2537724    | SRX2537724    | SRX2537724    |
| <b><i>P. vul. G21245**</i></b> | SRX2537725    | SRX2537725    | SRX2537725    | SRX2537725    | SRX2537725    |
| <b><i>P. vul. G21244**</i></b> | SRX540119     | SRX540119     | SRX540119     | SRX540119     | SRX540119     |
| <b><i>Glycine max</i></b>      | XP_006575588  | NP_001341125  | NP_001237272  | XP_003523488  | XP_003537971  |
| <b><i>Lotus japonicus</i></b>  | CAE02591      | CAE02598      | BAC20318      | CAB61243      | CAA98179      |
| <b><i>Medicago trunc.</i></b>  | XP_024640165  | XP_003611889  | XP_013459310  | XP_003618108  | XP_013456161  |

\*Identifier has not been assigned for BAT93 proteins and therefore they were inferred from its assembly accession.

\*\*Idem for *P. vulgaris* genomes G23587, G23724, G21244 and G21245, identifier has not been yet assigned for proteins and therefore these were inferred from its SRAs accessions.

**SI. Table 2:** Analysis of model topology of proteins Nfr1 and Nfr5. PyMOL (Molecular Graphics System v2.4, Schrödinger, LLC) and VMD were used to assess topology and calculate values of root-mean-square deviation, RMSD [32, 33]

| GENOME | PROTEIN | PDB ID | METHOD | RANGE   | SEQUENCE IDENTITY | SEQUENCE SIMILARITY | COVERAGE | RESOLUTION | TEMPLATE                                                                              | DESCRIPTION                                                                    | RMSD  |
|--------|---------|--------|--------|---------|-------------------|---------------------|----------|------------|---------------------------------------------------------------------------------------|--------------------------------------------------------------------------------|-------|
| BAT93  | nfr1    | 6CTH   | Ray-X  | 289-580 | 36.71             | 0.38                | 0.48     | 1.70Å      | Crystal Structure of Pathogenesis-related Protein 1G (PR-1G) Kinase Domain from Cacao | Concanavalin A-like lectin protein kinase family protein                       | 0.000 |
| G19833 | nfr1    | 6CTH   | Ray-X  | 289-580 | 36.71             | 0.38                | 0.48     | 1.70Å      | Crystal Structure of Pathogenesis-related Protein 1G (PR-1G) Kinase Domain from Cacao | Concanavalin A-like lectin protein kinase family protein                       | 0.000 |
| G21244 | nfr1    | 6CTH   | Ray-X  | 289-580 | 37.06             | 0.38                | 0.48     | 1.70Å      | Crystal Structure of Pathogenesis-related Protein 1G (PR-1G) Kinase Domain from Cacao | Concanavalin A-like lectin protein kinase family protein                       | 1.104 |
| G21245 | nfr1    | 6CTH   | Ray-X  | 289-580 | 37.06             | 0.38                | 0.48     | 1.70Å      | Crystal Structure of Pathogenesis-related Protein 1G (PR-1G) Kinase Domain from Cacao | Concanavalin A-like lectin protein kinase family protein                       | 1.104 |
| G23587 | nfr1    | 6CTH   | Ray-X  | 289-580 | 37.06             | 0.38                | 0.48     | 1.70Å      | Crystal Structure of Pathogenesis-related Protein 1G (PR-1G) Kinase Domain from Cacao | Concanavalin A-like lectin protein kinase family protein                       | 1.104 |
| G23724 | nfr1    | 6CTH   | Ray-X  | 289-580 | 37.06             | 0.38                | 0.48     | 1.70Å      | Crystal Structure of Pathogenesis-related Protein 1G (PR-1G) Kinase Domain from Cacao | Concanavalin A-like lectin protein kinase family protein                       | 1.104 |
| BAT93  | nfr5    | 6BFN   | Ray-X  | 300-570 | 31.92             | 0.36                | 0.44     | 2.26Å      | Crystal structure of human IRAK1                                                      | Interleukin-1 receptor-associated kinase 1<br>Crystal structure of human IRAK1 | 0.000 |
| G19833 | nfr5    | 6BFN   | Ray-X  | 300-570 | 31.03             | 0.36                | 0.44     | 2.26Å      | Crystal structure of human IRAK1                                                      | Interleukin-1 receptor-associated kinase 1<br>Crystal structure of human IRAK1 | 0.015 |
| G21244 | nfr5    | 6BFN   | Ray-X  | 300-570 | 31.03             | 0.36                | 0.44     | 2.26Å      | Crystal structure of human IRAK1                                                      | Interleukin-1 receptor-associated kinase 1<br>Crystal structure of human IRAK1 | 0.762 |
| G21245 | nfr5    | 6BFN   | Ray-X  | 300-570 | 31.03             | 0.36                | 0.44     | 2.26Å      | Crystal structure of human IRAK1                                                      | Interleukin-1 receptor-associated kinase 1<br>Crystal structure of human IRAK1 | 0.791 |
| G23587 | nfr5    | 6BFN   | Ray-X  | 300-570 | 31.54             | 0.36                | 0.44     | 2.26Å      | Crystal structure of human IRAK1                                                      | Interleukin-1 receptor-associated kinase 1<br>Crystal structure of human IRAK1 | 0.761 |
| G23724 | nfr5    | 6BFN   | Ray-X  | 300-570 | 31.42             | 0.36                | 0.44     | 2.26Å      | Crystal structure of human IRAK1                                                      | Interleukin-1 receptor-associated kinase 1<br>Crystal structure of human IRAK1 | 0.820 |
